# Supplementary material for: IL-21 enhances influenza vaccine responses in aged macaques with suppressed SIV infection
Source: JCI journal article supplement (doi:10.1172/jci.insight.150888), 2021-09-07
Supplement: sd1 [file 1]

## Supplementary Figures

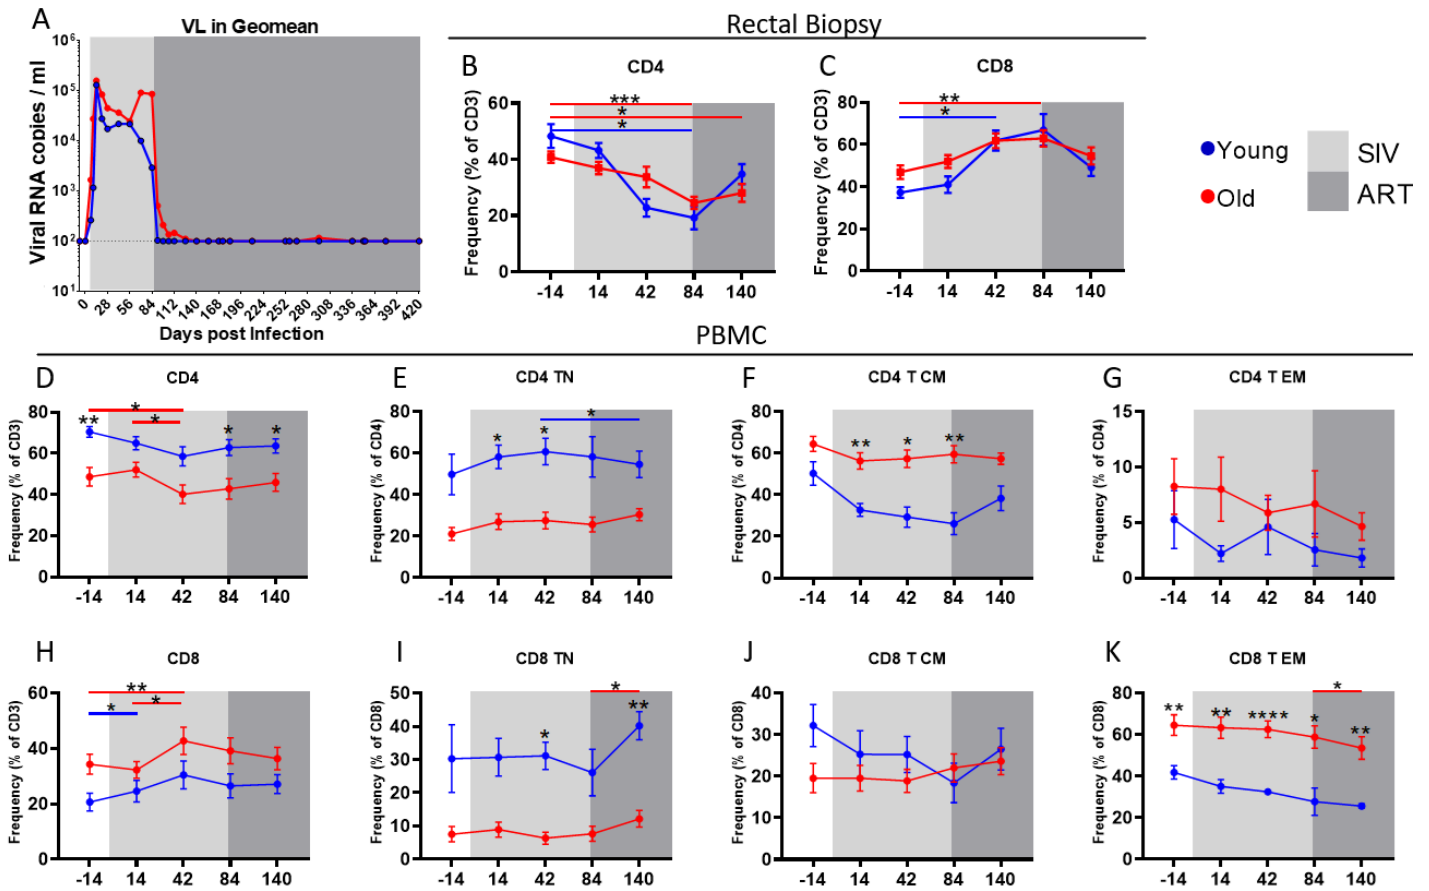

**Figure S1.** Rhesus macaque model of aging and SIV infection. **(A)** Geometric mean of the plasma viral load (VL) in young (n=4) and old (n=12) infected animals. **(B)** longitudinal CD4 and CD8 T cell frequencies of CD3+ LIVE/Dead- cells isolated from rectal biopsies in young (n=4) and old (n=12) animals. **(C)** longitudinal peripheral blood mononuclear cell (PBMC) CD4 and CD8 frequencies of CD3+ LIVE/Dead- cells as well as CD4 and CD8 memory subset frequencies including T naïve (TN), TCM (T central memory) and effector memory (EM) in young (n=4) and old (n=12) animals. Data is displayed as mean  $\pm$  SEM, \*  $p < 0.05$ , \*\*  $p < 0.005$ , \*\*\*  $p < 0.005$ , Longitudinal comparisons and young vs old comparisons were performed with two-way ANOVA using Fisher's LSD post hoc multiple comparisons correction.

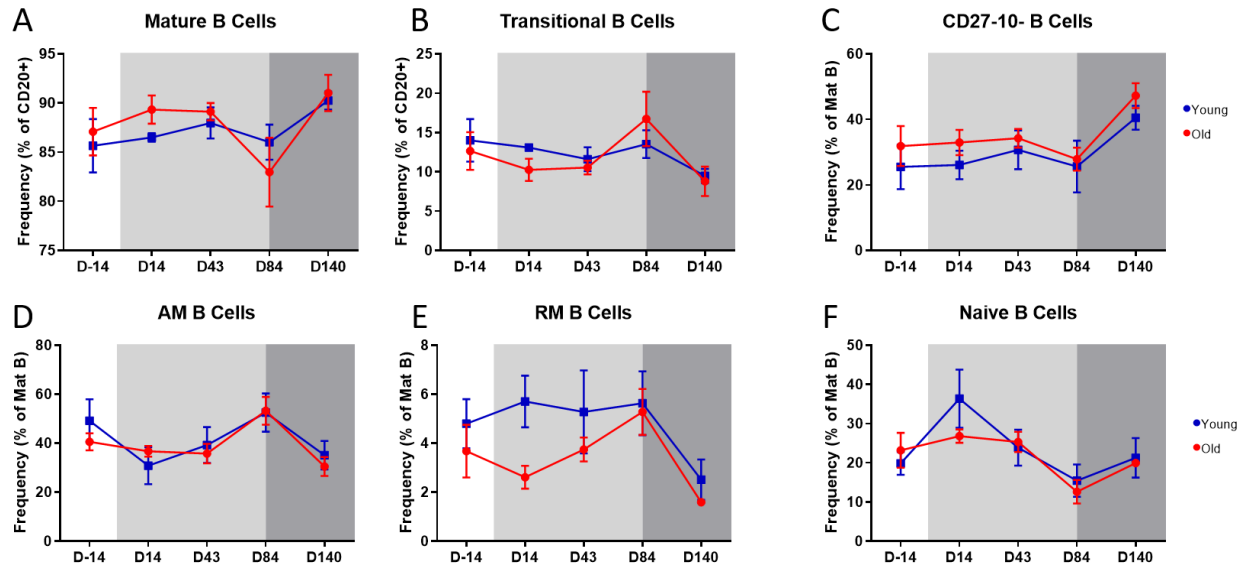

**Figure S2:** Rhesus macaque model of aging and SIV infection: SIV and ART phase PBMC B cell subset frequencies. (A) Mature B cells (Lin-CD20+CD10-), and (B) Transitional B cells (Lin-CD20+CD10+), are shown as frequency of CD20+ cells. (C) CD27-10- B cells (Lin-CD20+CD10-CD27-), (D) Activated memory B cells (Lin-CD20+CD10-CD21loCD27+), (E) resting memory B cells (Lin-CD20+CD10-CD21hiCD27+) and (F) naïve B cells (Lin-CD20+CD10-CD21hiCD27-) are shown as frequency of mature B cells for young (n=4) and old (n=12) animals. Light grey shading indicates time of SIV infection, dark grey shading indicates ART therapy start and duration. Longitudinal comparisons and young vs old comparisons were performed with two-way ANOVA using Fisher's LSD post hoc multiple comparisons correction.

## Systemic Immunization Scheme

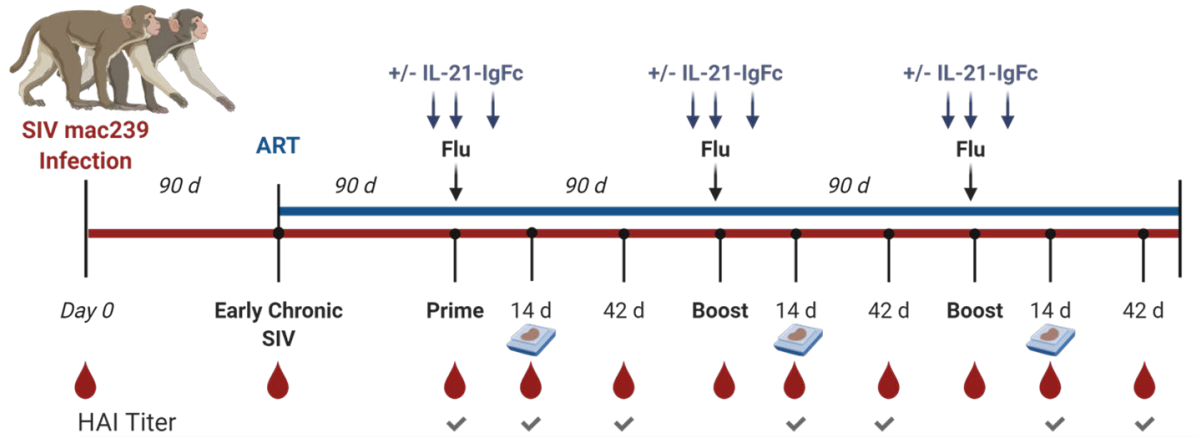

**Figure S3.** Schematic illustration of protocol for SIV infection, ART treatment, systemic influenza immunization and sample collection. SIVmac239 was administered at 200 TCID<sub>50</sub>, IV. ART was initiated 90 days post infection PMPA/FTC/L-000870812. 90 days post ART-initiation the trivalent 2015-2016 seasonal influenza vaccine (Afluria vaccine manufactured by bioCSL with 15 µg each of H1N1, H3N2 and B antigens) was administered intramuscularly in a prime-boost-boost strategy at 3-month intervals. IL-21-IgFc [50µg/kg body weight] was administered subcutaneously in 3 doses: 1) on day -2 before each vaccination at the upcoming vaccination site to prime immune cells, 2) concurrent and co-located to the site of vaccination, and 3) 7 days post vaccination. Red blood spot cartoons indicate days of blood collection for PBMC, plasma and serum isolation; draining LN collection on D14 post vaccine timepoints are indicated by cartoon of formalin fixed paraffin embedded block.

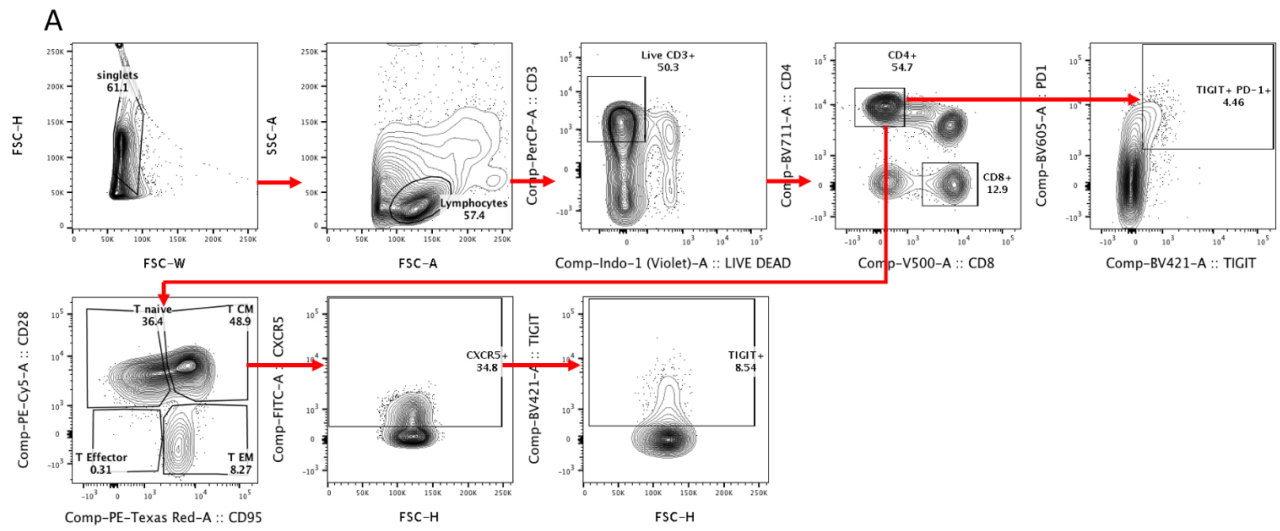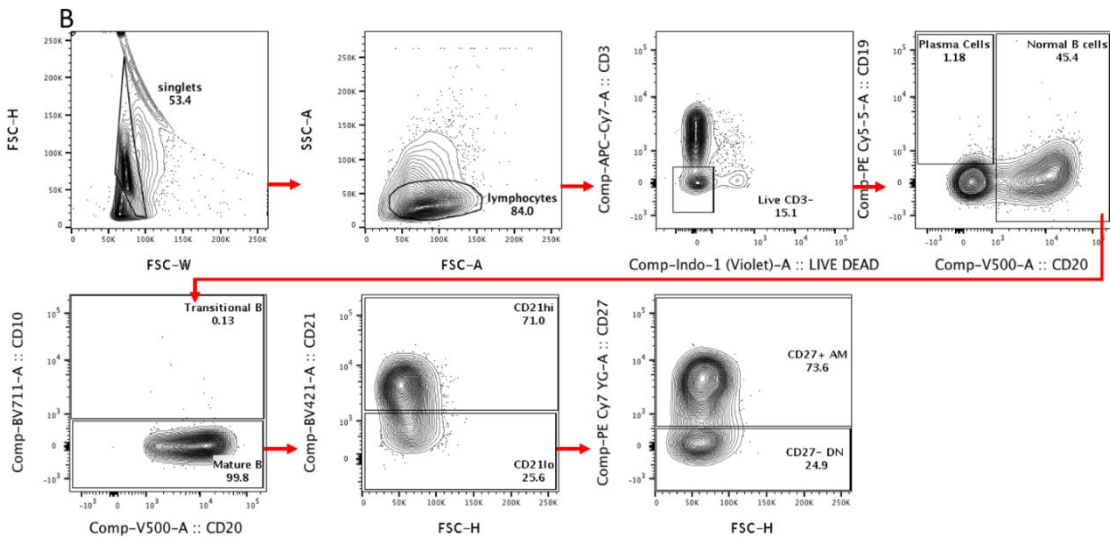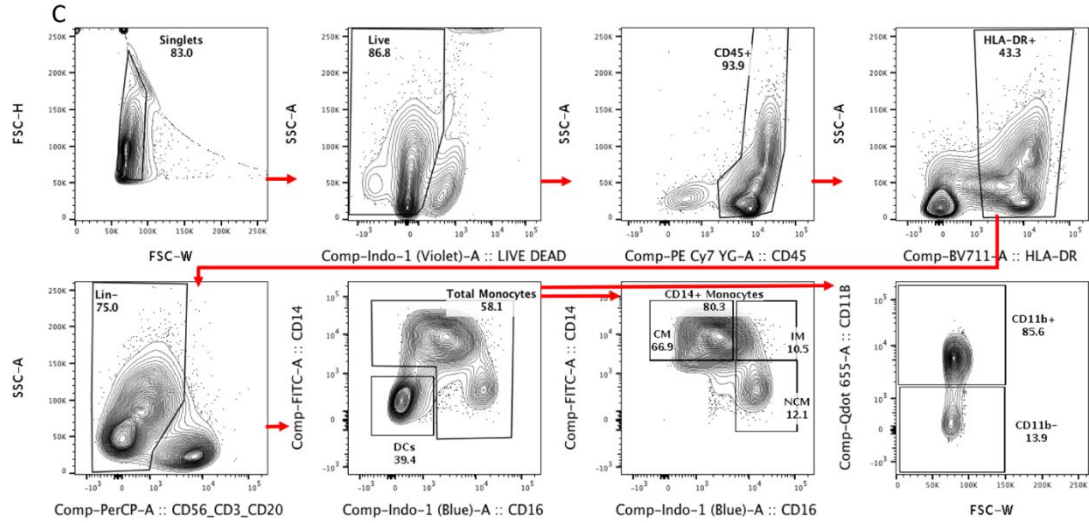

**Figure S4: Flow cytometry gating strategies.** (A) Representative figures showing gating strategy used for CD4+ and CD8+ T cells, maturation subsets, pTfh (CD4+/T CM/CXCR5+) and gating for TIGIT+ and TIGIT+PD-1+ populations. (B) Representative figures showing gating strategy used for normal B (CD20+), transitional B (CD20+CD10+), mature B (CD20+CD10-) and CD20+CD10-CD21loCD27+ activated memory and CD20+CD10-CD21loCD27- double negative B cell populations. (C) Representative figures showing gating strategy used for monocyte subsets. Total monocytes were considered CD45+HLA-DR+Lin- and inclusive of classical monocytes (CD14+CD16-), intermediate monocytes (CD14+CD16+) and non-classical monocytes (CD14-CD16+). Gating for total monocyte CD11b+ population is also shown. Analysis was performed with FlowJo (Treestar).

**A**

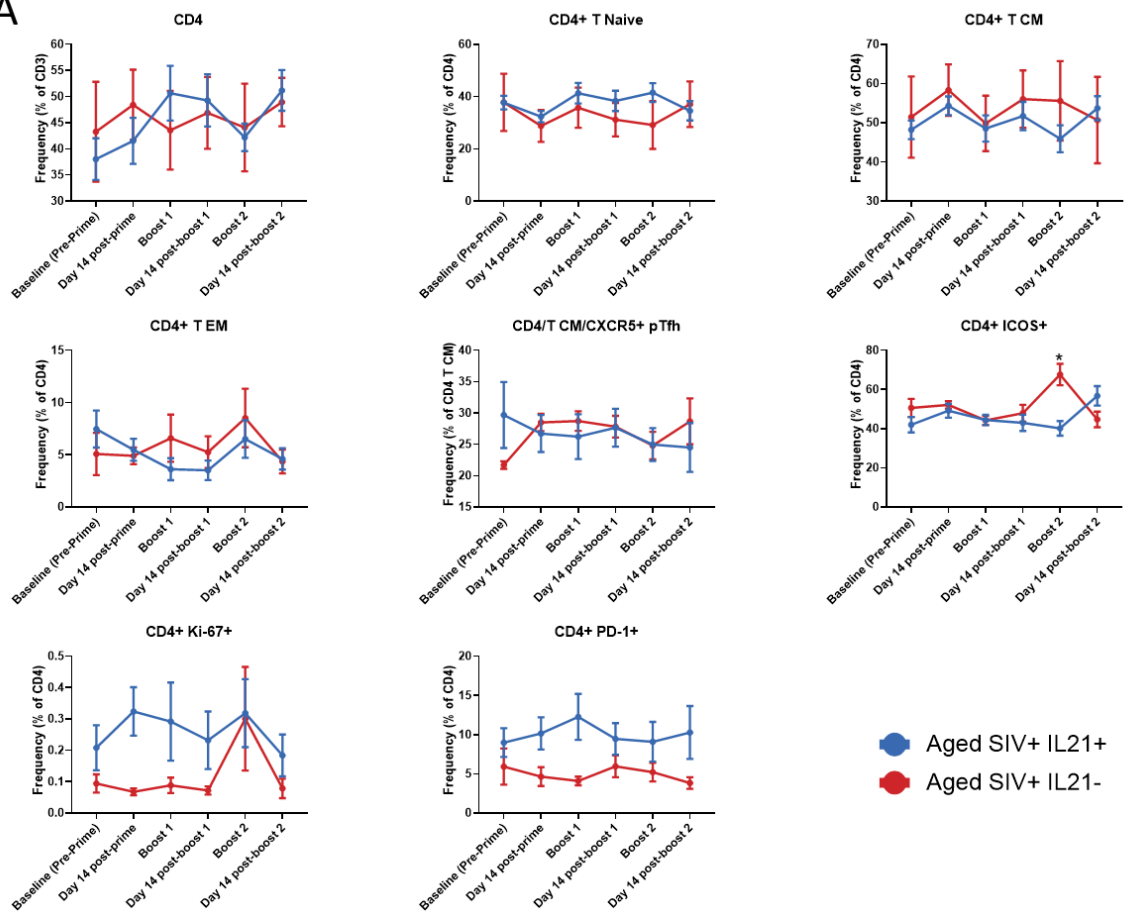

**B**

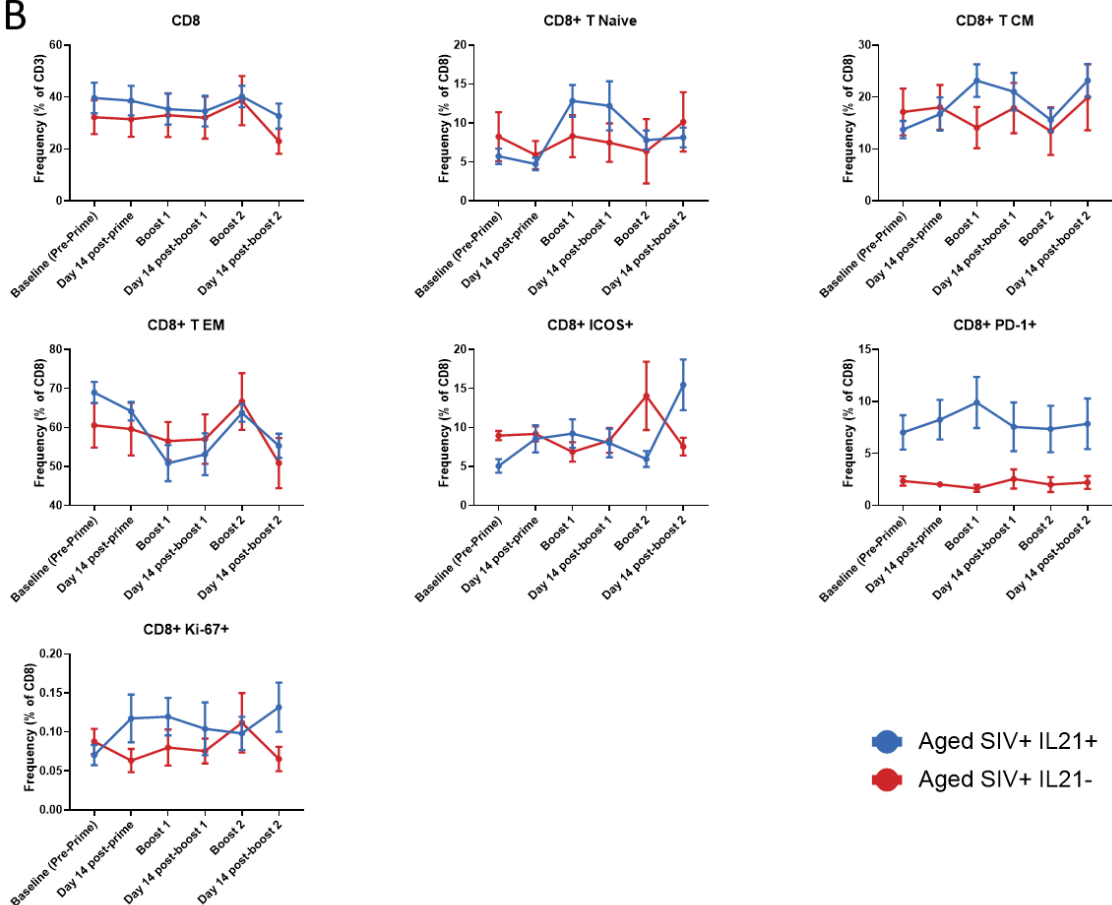

**Figure S5:** Longitudinal vaccine phase Immune phenotyping. Longitudinal frequencies of total (A) CD4 and (B) CD8 as well as respective maturation subset distributions and expression of markers including ICOS, Ki-67 and PD-1 for aged SIV+ IL21+ (n=8), and aged SIV+ IL21- (n=4). \*  $p < 0.05$ , Longitudinal comparisons and young vs old comparisons were performed with two-way ANOVA using Fisher's LSD post hoc multiple comparisons correction.

# A

## D14 Post Prime

# B

## D14 Post Boost 1

# C

## D14 Post Boost 2

T

B

Mono

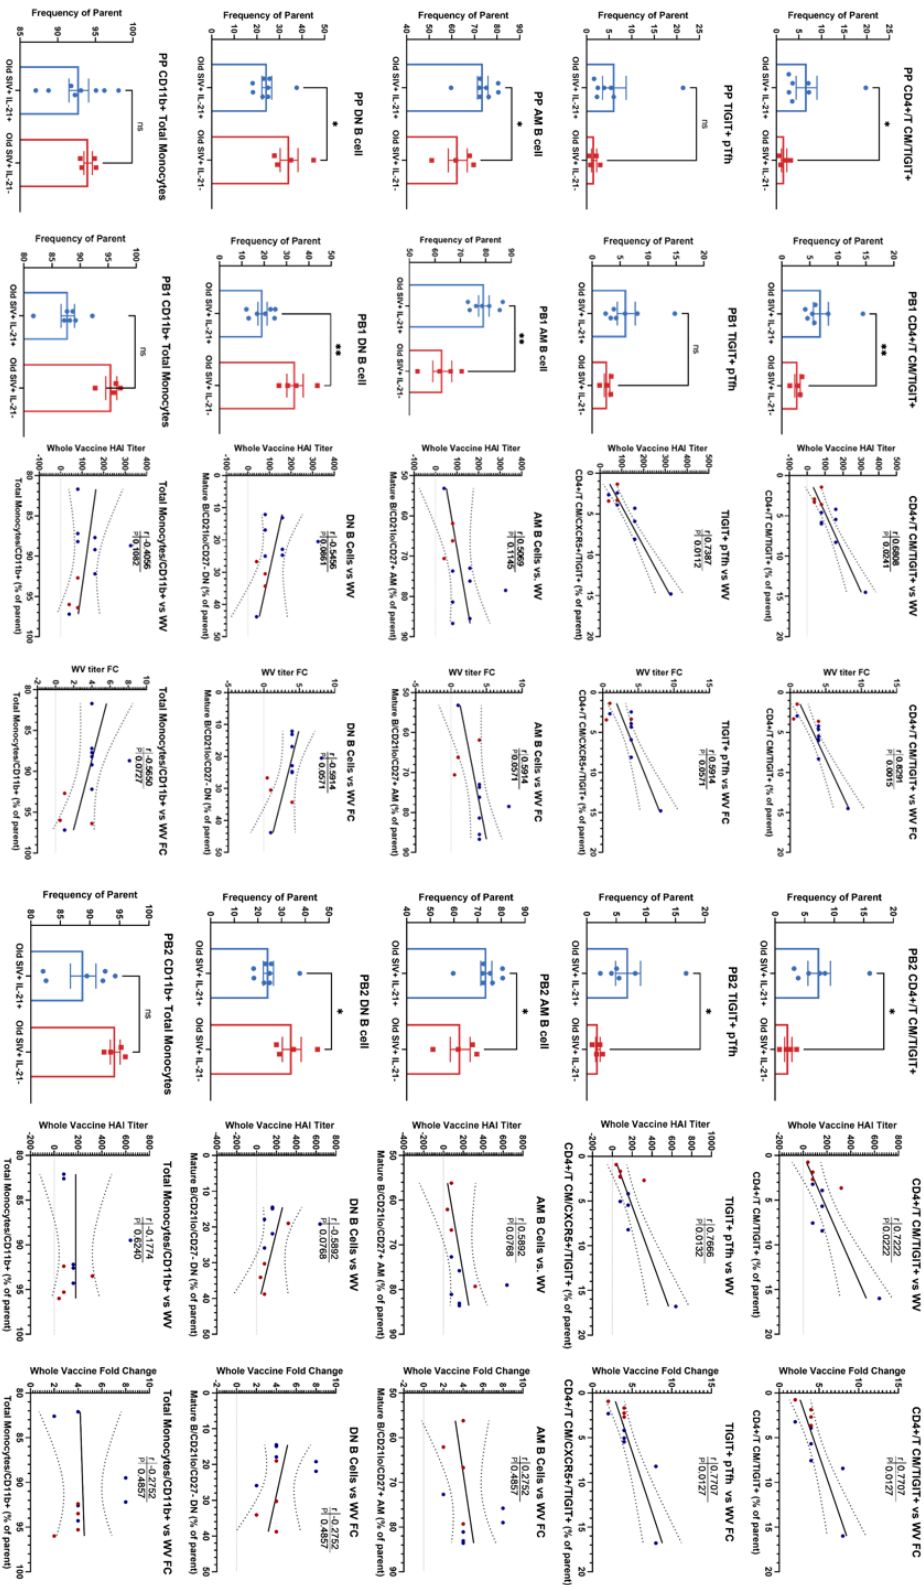

**Figure S6: D14 post-prime, post-B1 and post-B2 Immune phenotypes and correlation with HAI titer.** (A) D14 post-prime (PP) peripheral TIGIT+ frequencies of CD4+ TCM, pTfh (CD4+/TCM/CXCR5+), D14 post-prime peripheral AM and CD21loCD27- (DN) B cell frequencies, as well as D14 post-prime peripheral CD11b+ total monocyte frequency. (B) D14 post-B1 (PB1) peripheral TIGIT+ frequencies of CD4+ TCM, pTfh (CD4+/TCM/CXCR5+), D14 post-B1 peripheral AM and CD21loCD27- (DN) B cell frequencies, as well as D14 post-B1 peripheral CD11b+ total monocyte frequency, and correlations between subset frequencies and D14 post-B1 whole vaccine HAI titers and HAI titer fold change from day of B1. (C) D14 post-B2 (PB2) peripheral TIGIT+ frequencies of CD4+ TCM, pTfh (CD4+/TCM/CXCR5+), D14 post-B2 peripheral AM and CD21loCD27- (DN) B cell frequencies, as well as D14 post-B2 peripheral CD11b+ total monocyte frequency, and correlations between subset frequencies and D14 post-B2 whole vaccine HAI titers and HAI titer fold change from day of B2. \*  $p < 0.05$ , Mann Whitney test and Spearman R correlations performed.

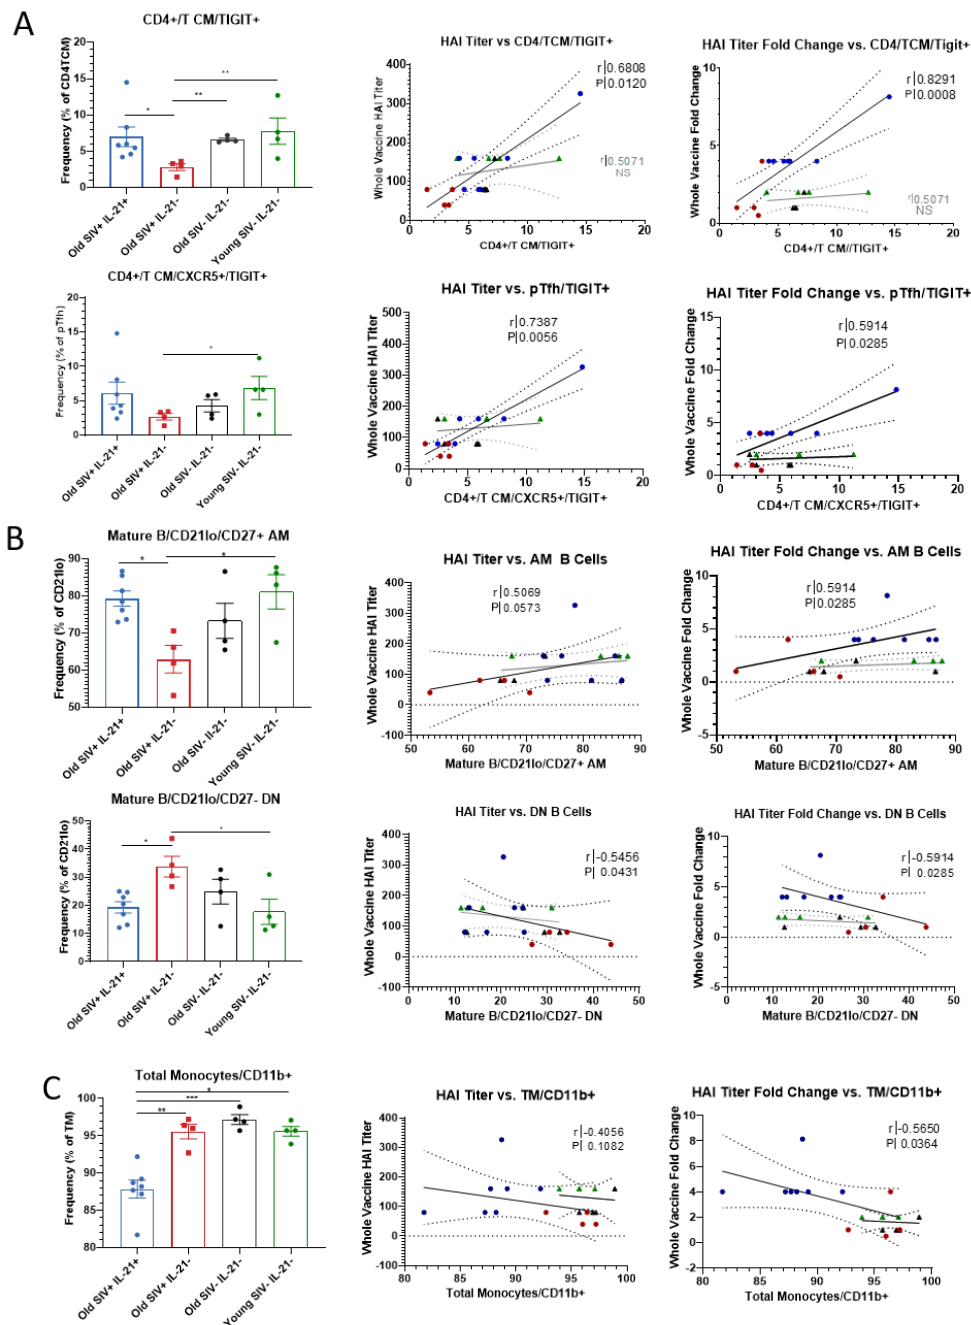

**Figure S7.** Post-B1 peripheral T, B and monocyte subsets and correlation with whole vaccine HAI titers including SIV- IL-21-untreated old and young controls (A) D14 post-B1 TIGIT+ frequencies of CD4+ TCM and pTfh (CD4+/TCM/CXCR5+) and correlations with D14 post-B1 whole vaccine HAI titers and HAI titer fold change from boost 1 baseline. Blue dots represent old SIV+ IL-21+ animals (n=8), red dots represent old SIV+ IL-21- animals (n=4) black dots represent old SIV- IL-21- (n=4) and green dots represent young SIV- IL-21- animals (n=4) (B) D14 post-B1 CD27+ AM B cell and CD27- DN B cell frequencies of CD21lo mature B cells and correlations with D14 post-B1 whole vaccine HAI titers and HAI titer fold change from boost 1 baseline. (C) D14 post-B1 CD11b+ frequencies of total monocytes (including Lineage-, CD14+CD16-, CD14+CD16+, and CD14-CD16+) and correlation with D14 post-B1 whole vaccine HAI titers and HAI titer fold change from boost 1 baseline. \*  $p < 0.05$ , \*\*  $p < 0.005$ , \*\*\*  $p < 0.0005$  Mann Whitney test and Spearman R correlations performed.

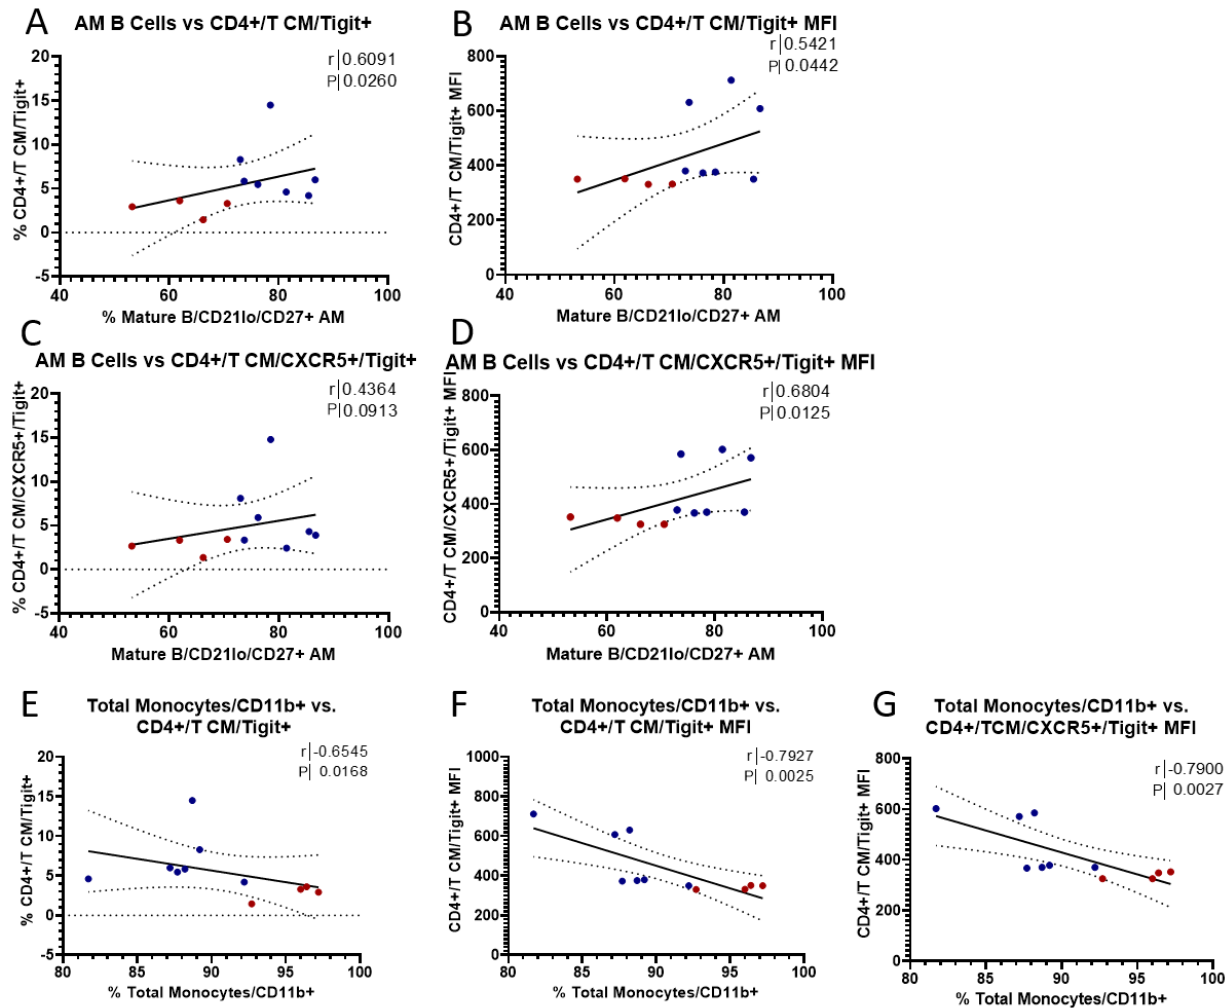

**Figure S8. Post-B1 PBMC Immune subset Interrelationships** (A) inter-subset correlations between D14 post-B1 cell subset frequencies/MFI. Blue dots represent old SIV+ IL-21+ animals (n=8), while red dots represent old SIV+ IL-21- animals (n=4). Spearman R correlations were performed.

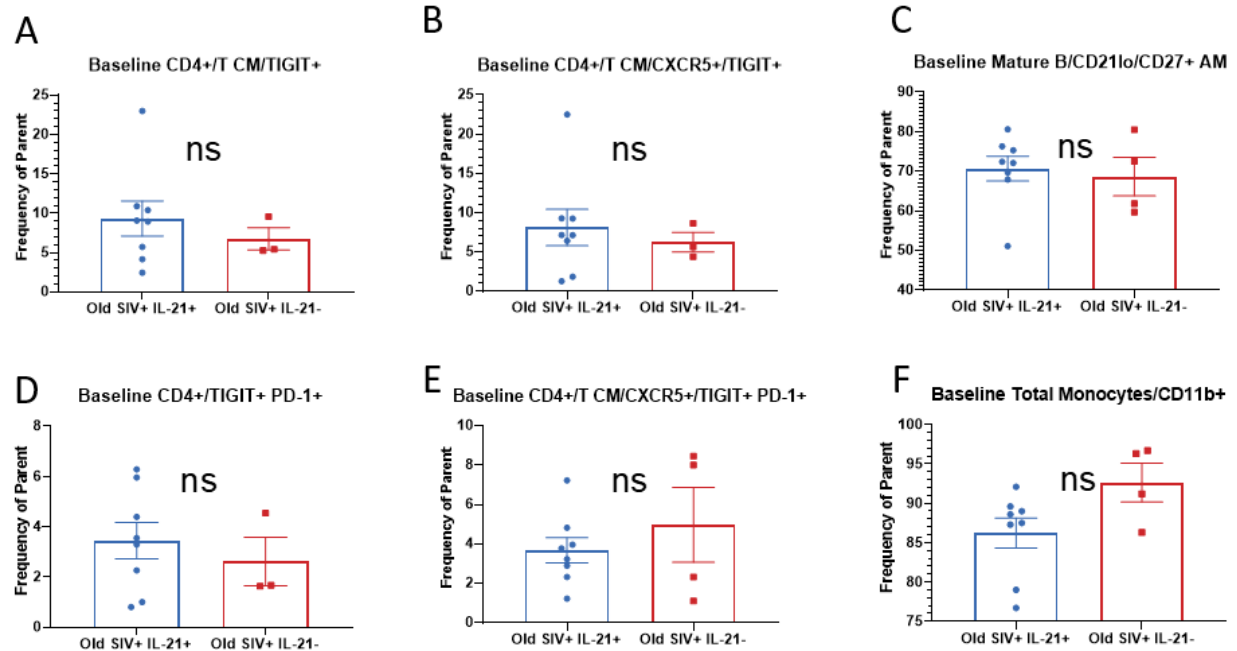

**Figure S9:** Pre-vaccination baseline frequencies of (A) CD4+/TCM/TIGIT+, (B) (CD4+/TCM/CXCR5+/TIGIT+), (C) CD27+ AM B cell frequencies of CD21lo mature B cells, (D) TIGIT+ PD-1+ double positive frequencies of total CD4+ and (E) TIGIT+ PD-1+ double positive CD4+ TCM, (F) as well as baseline frequencies of CD11b+ total monocytes. Mann Whitney tests were performed.

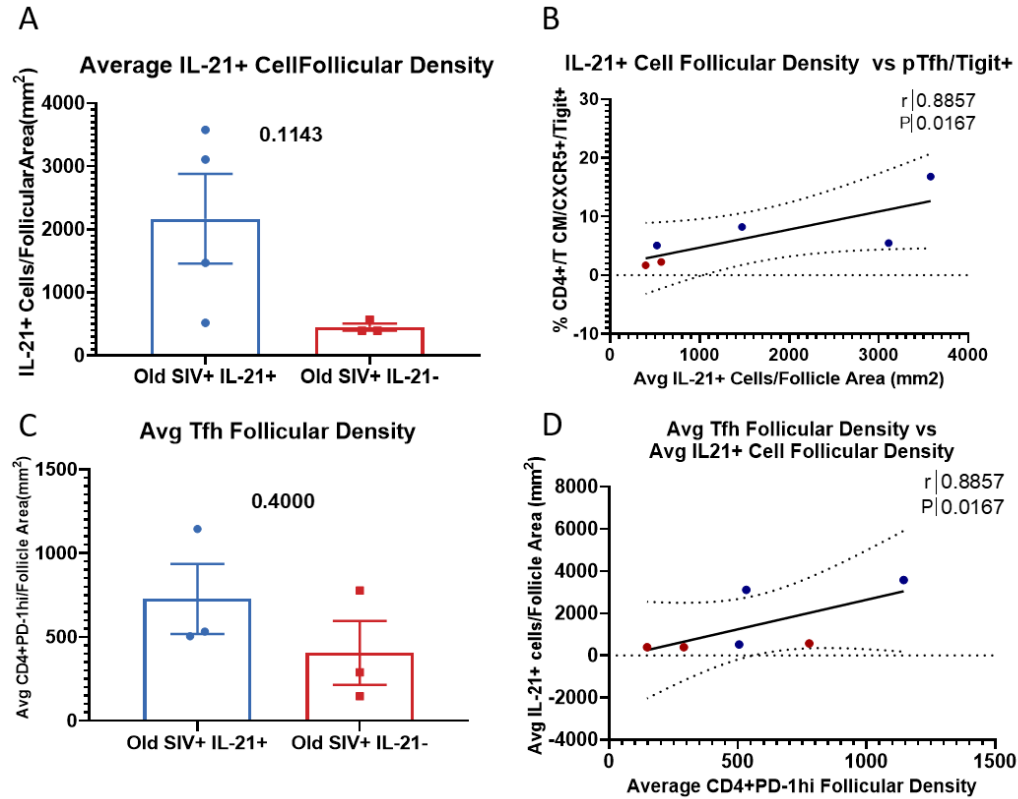

**Figure S10: D14 post-B2 LN follicle cell densities and correlations.** (A) D14 post-B2 LN tissue IL-21+ and (C) Tfh CD4+PD-1hi average cell densities/follicle. (B) Correlation between peripheral D14 post-B2 TIGIT+ pTfh (CD4+/TCM/CXCR5+) and D14 post-B2 average LN follicle IL-21+ cell density. (D) Correlation between D14 post-B2 average LN follicle IL-21+ cell density and average LN follicle density of Tfh (CD4+PD-1+) cells. Mann Whitney test and Spearman R correlations were performed.

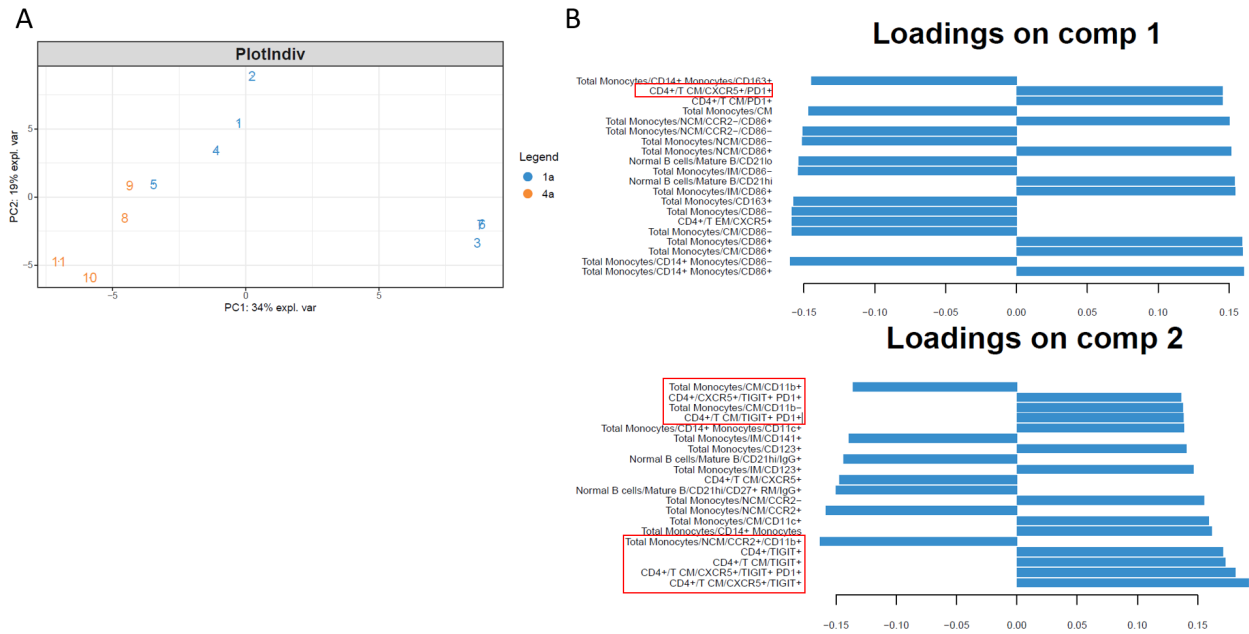

**Figure S11.** Unsupervised PCA analysis reveals separation of IL-21 treated vs untreated animals and indicates favorable sPLS-DA reliability.

(A) PCA components 1 and 2 plotted on x and y axis respectively. Plotted numbers indicate individual animals, with blue indicated IL-21 treated animals (n=7) and orange indicating controls (n=4). (B) The top 20 loading variables and their loading scores are shown for PCA components 1 and 2. Populations similar to those identified to be altered by IL-21 immunotherapy through manual univariate analysis are indicated by red boxes.
